# Supplementary material for: Enhancement of catalytic centres by RuO2 addition to CuFe2O4 cathode catalyst for rechargeable lithium–air batteries: influence of CO2 on Li–O2 battery performances
Source: Royal Society of Chemistry journal article supplement (doi:10.1039/d4se01202j), 2024-01-01
Supplement: d4se01202j2.pdf [file d4se01202j2.pdf]

## Supplementary data

### **Enhanced Catalytic Centres by RuO<sub>2</sub> addition to CuFe<sub>2</sub>O<sub>4</sub> Cathode Catalyst towards Rechargeable Lithium-Air Battery: Influence of CO<sub>2</sub> on the Li-O<sub>2</sub> battery performances**

*Pamangadan C Sharafudeen and Perumal Elumalai\**

Electrochemical Energy Storage Lab, Department of Green Energy Technology, Madanjeet School of Green Energy Technologies, Pondicherry University, Puducherry – 605014, India

#### **Materials used**

Copper nitrate trihydrate (Cu(NO<sub>3</sub>)<sub>2</sub>·3H<sub>2</sub>O, Sigma-Aldrich), ferric nitrate nonahydrate (Fe(NO<sub>3</sub>)<sub>3</sub>·9H<sub>2</sub>O, Loba chemicals), Ruthenium oxide (RuO<sub>2</sub>, Sigma-Aldrich) and glycine (C<sub>2</sub>H<sub>5</sub>NO<sub>2</sub>, Avra chemicals) were used for the synthesis of the RuO<sub>2</sub>@CuFe<sub>2</sub>O<sub>4</sub>. The non-aqueous electrolyte was comprised of lithium triflate (LiCF<sub>3</sub>SO<sub>3</sub>, Sigma-Aldrich) in tetraethylene glycol dimethyl ether (TEGDME, Sigma-Aldrich). The separator used in the batteries were made of Whatman glass microfiber filter paper (Alfa Aesar).

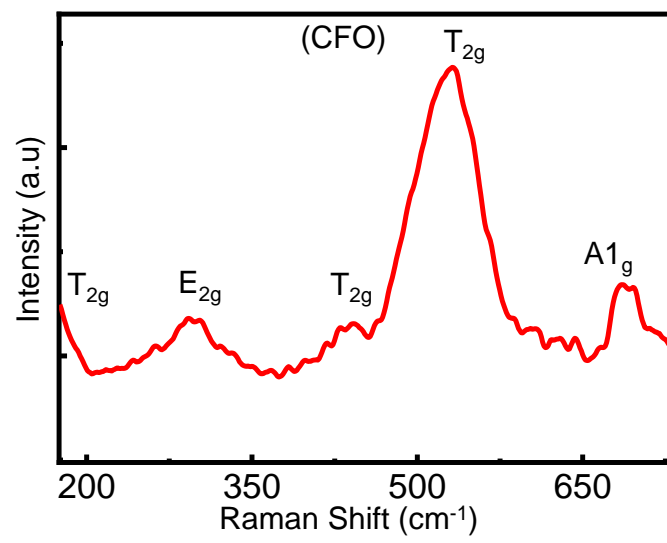

**Figure S1.** Raman spectrum recorded for the  $\text{CuFe}_2\text{O}_4$  powder sample.

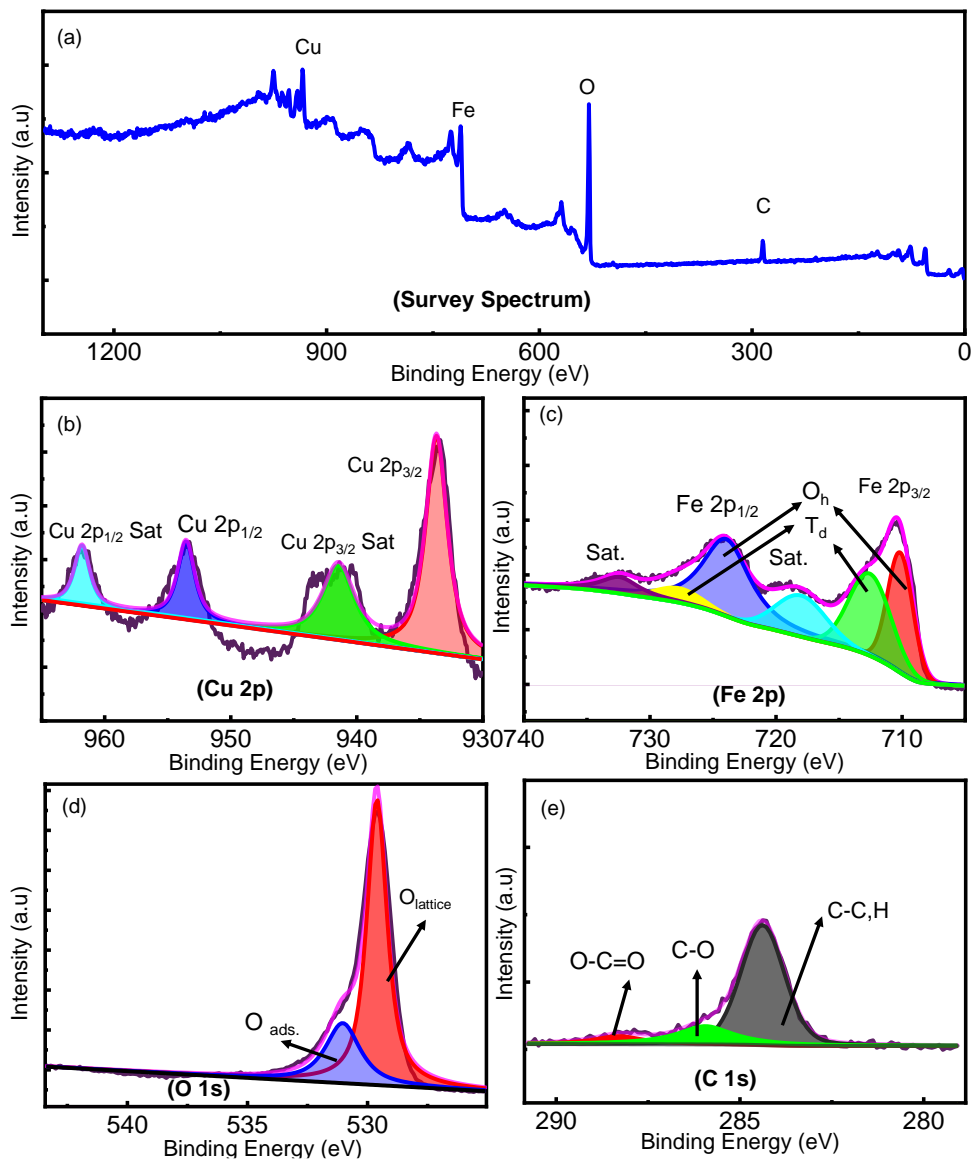

**Figure S2.** XPS (a) survey spectrum, and (b-e) Deconvoluted XPS profiles of Cu2p, Fe2p, O1s and C 1s scan profiles recorded for the CuFe<sub>2</sub>O<sub>4</sub> (CFO) sample.

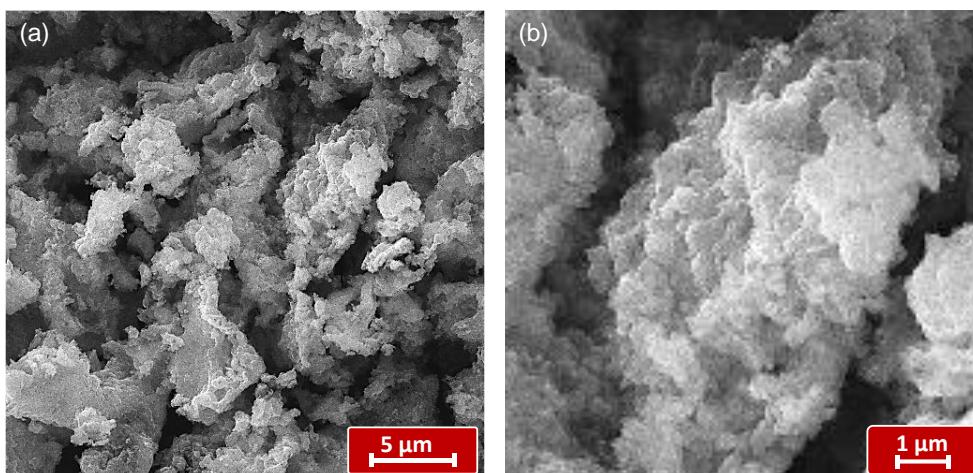

**Figure S3.** SEM images at different magnifications recorded for the pristine CuFe<sub>2</sub>O<sub>4</sub> sample.

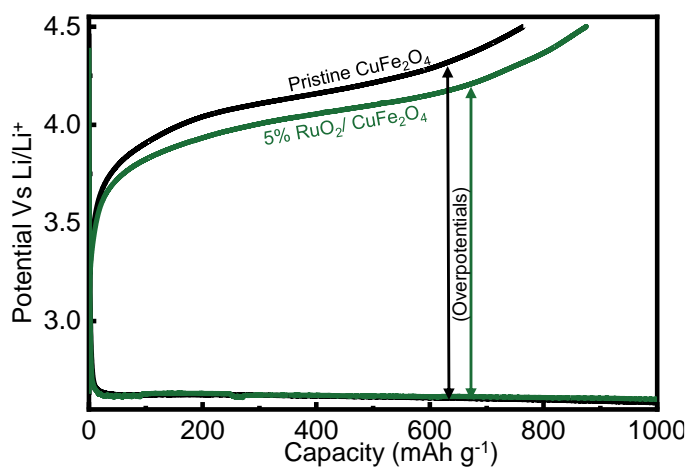

**Figure S4.** GCD curves recorded at a current density of 500 mA g<sup>-1</sup> for the Li-Air battery containing each of the pristine CuFe<sub>2</sub>O<sub>4</sub> and the RCFO-5 composite catalysts.

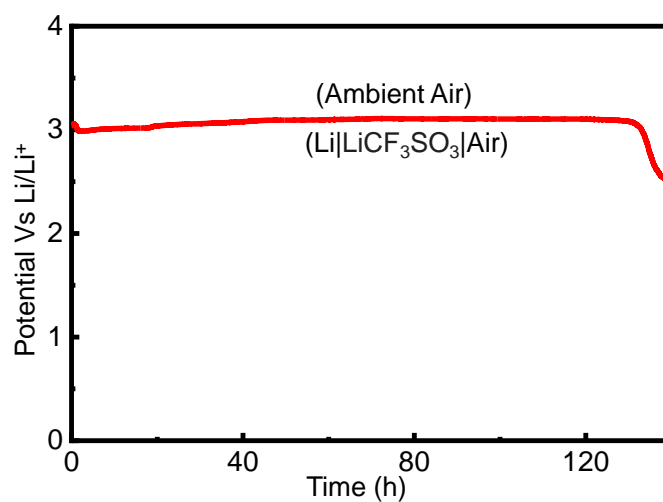

**Figure S5.** OCV profile recorded in the ambient atmosphere for the Li-Air battery having the RCFO-5 as the cathode catalyst.

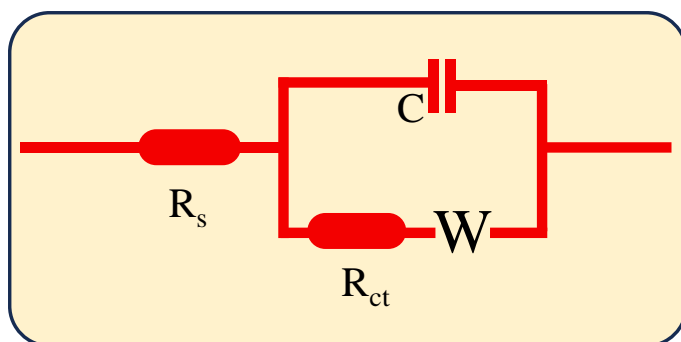

**Figure S6.** The equivalent circuit used to fit the obtained Nyquist plots in the Li-CO<sub>2</sub> battery.

**Table S1.** The  $R_{ct}$  resistance calculated at different depth of discharge in first and 5<sup>th</sup> discharge cycles.

| State           | Voltage (V) | $R_{ct}$ ( $\Omega$ ) |
|-----------------|-------------|-----------------------|
| First discharge | 3.1         | 271                   |
|                 | 2.5         | 310                   |
|                 | 2.0         | 366                   |
| Fifth discharge | 3.1         | 435                   |
|                 | 2.5         | 445                   |
|                 | 2.0         | 600                   |
